# Supplementary material for: Characterization of Polyphenolic Compounds from Bacopa procumbens and Their Effects on Wound-Healing Process
Source: MDPI journal article supplement (doi:10.3390/molecules27196521), 2022-10-02
Supplement: s1 [file s1]

## Supplementary Materials

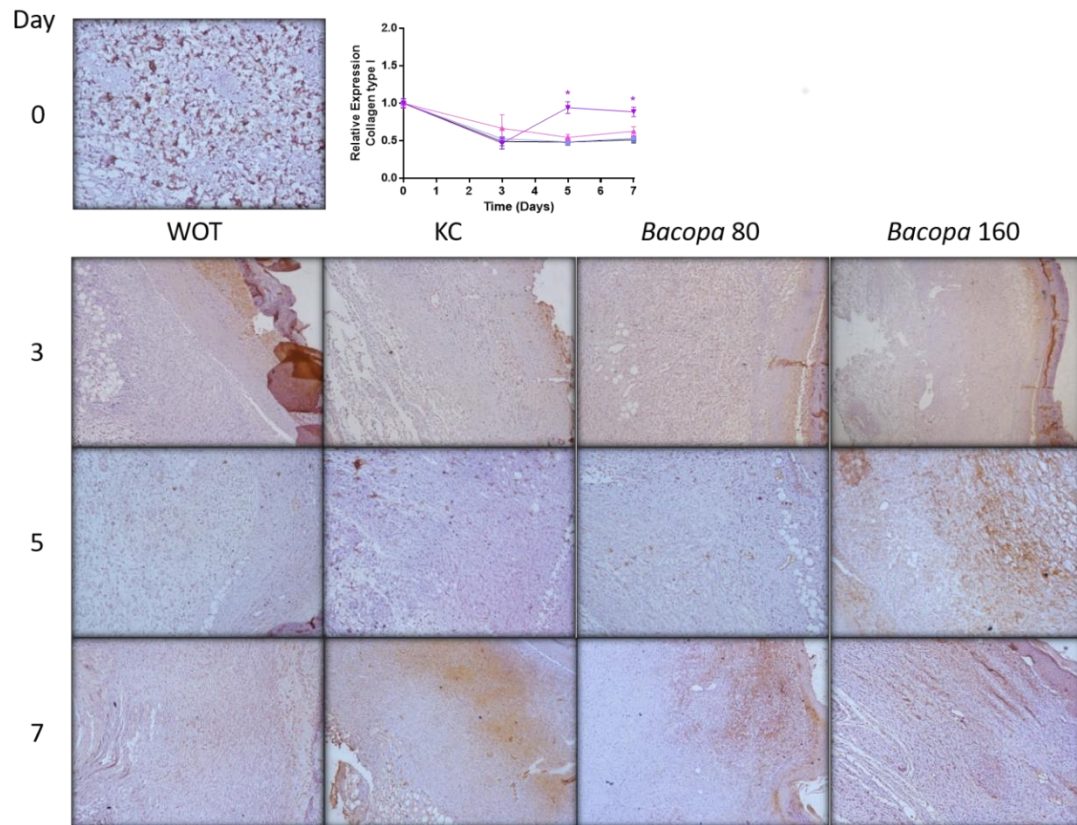

**Figure S1.** Collagen type I expression. Representative microphotographs of collagen type I protein by immunohistochemistry detection on wound tissue at different periods of time (0, 3, 5 and 7 days) in WOT (black line), KC (blue line), and 80 mg/mL (pink line) and 160 mg/mL (purple line) of PB. \* $p < 0.05$  vs WOT.

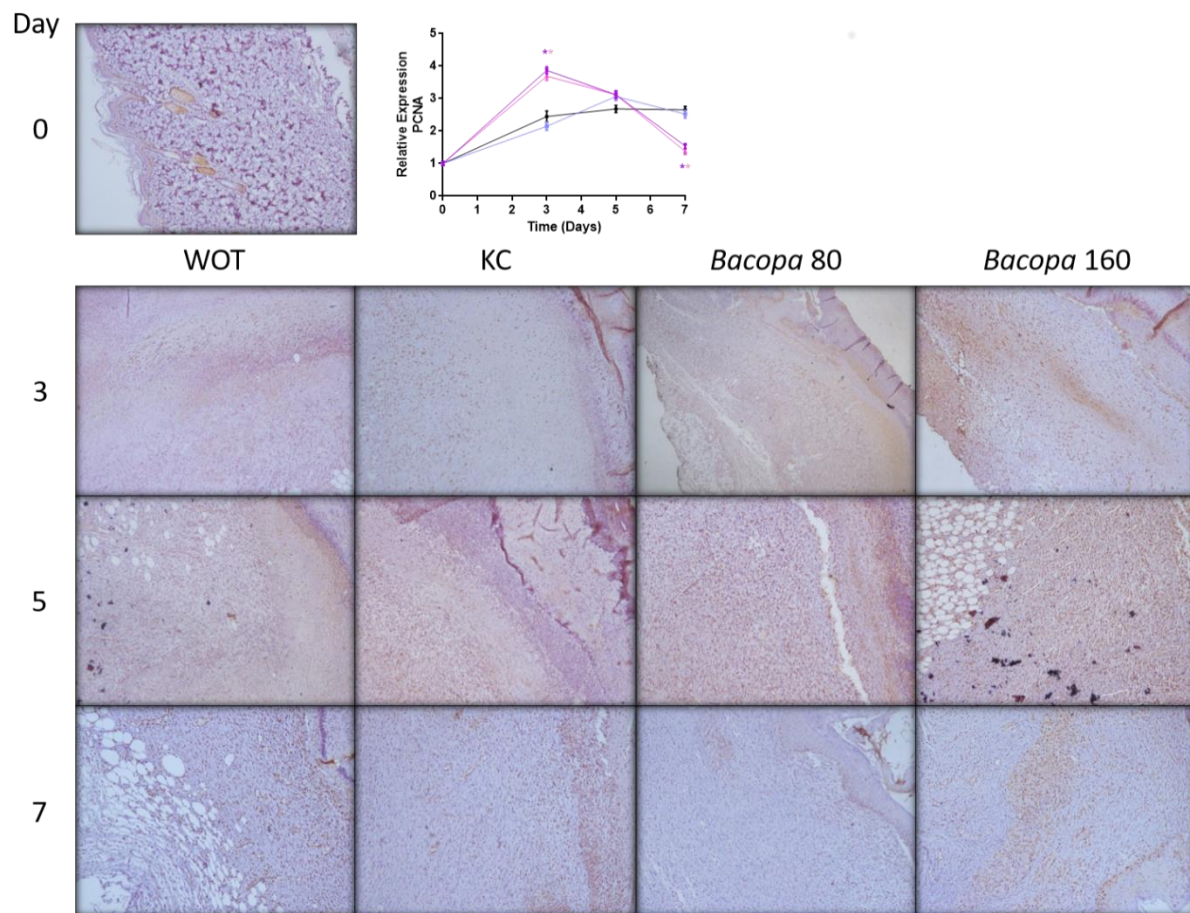

**Figure S2.** PCNA expression. Representative microphotographs of PCNA protein by immunohistochemistry detection on wound tissue at different periods of time (0, 3, 5 and 7 days) in WOT, WOT (black line), KC (blue line), and 80 mg/mL (pink line) and 160 mg/mL (purple line) of PB.  $*p < 0.05$  vs WOT.

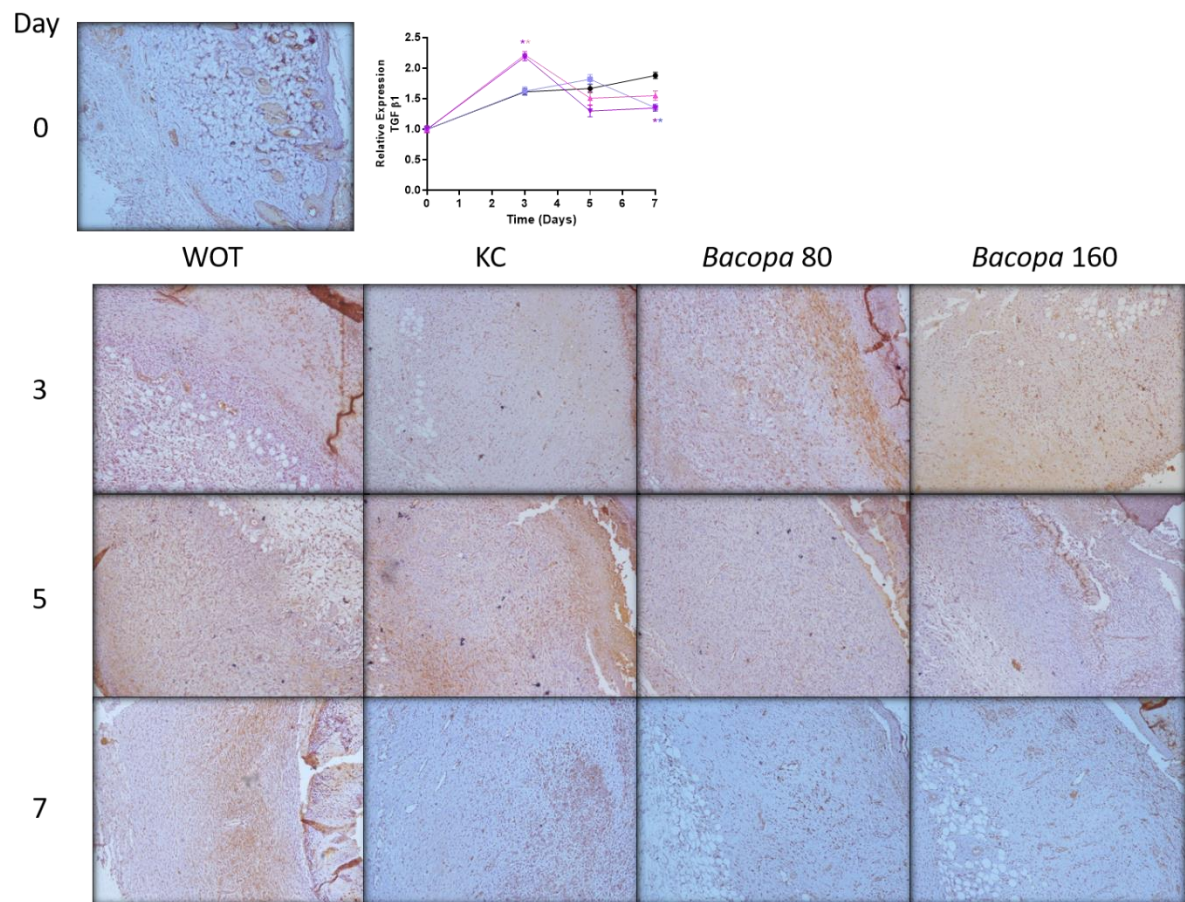

**Figure S3.** TGF $\beta$ 1 expression. Representative microphotographs of TGF $\beta$ 1 protein expression from wound tissues were analyzed by immunohistochemistry at different periods of time (0, 3, 5 and 7 days) in WOT (black line), KC (blue line), and 80 mg/mL (pink line) and 160 mg/mL (purple line) of *PB*. \* $p < 0.05$  vs WOT.



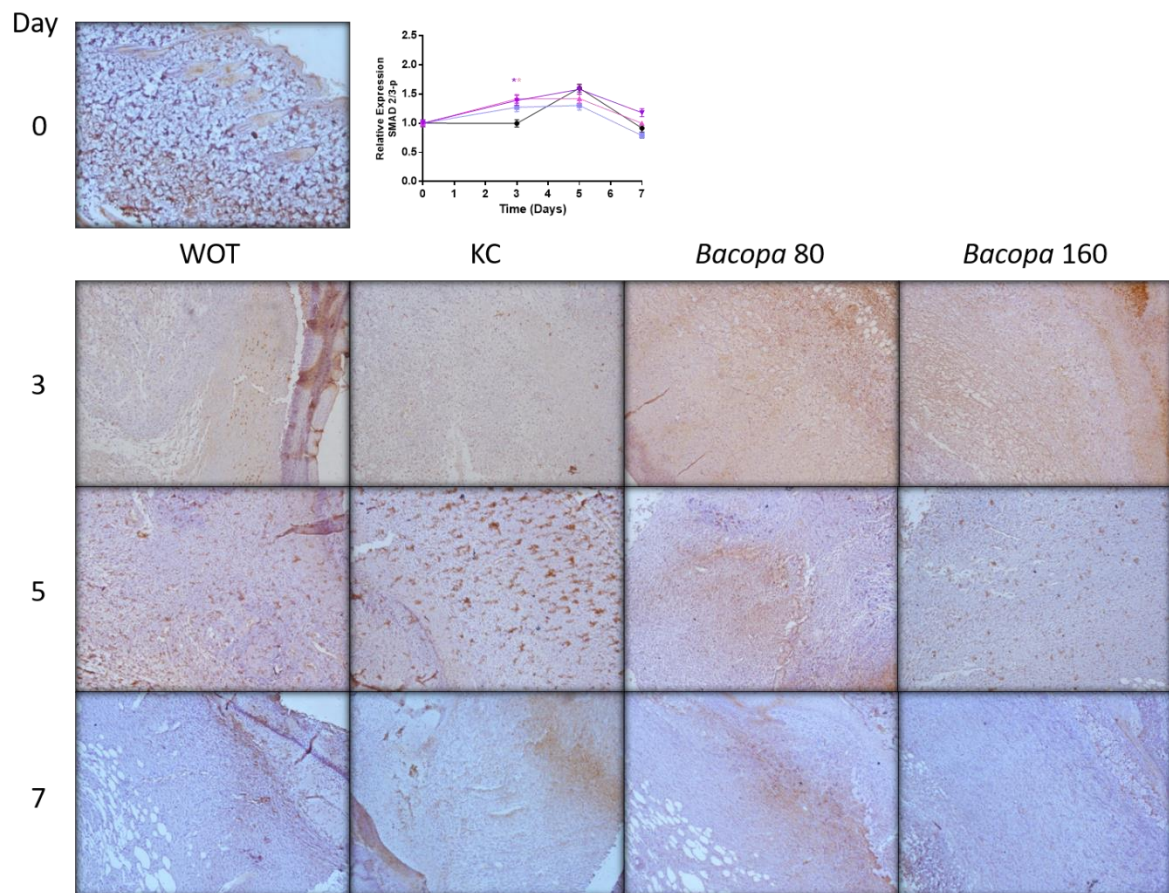

**Figure S4.** SMAD 2/3-p expression. Representative microphotographs of SMAD 2/3 phosphorylated protein by immunohistochemistry detection on wound tissue at different periods of time (0, 3, 5 and 7 days) in WOT (black line), KC (blue line), and 80 mg/mL (pink line) and 160 mg/mL (purple line) of PB. \* $p < 0.05$  vs WOT.

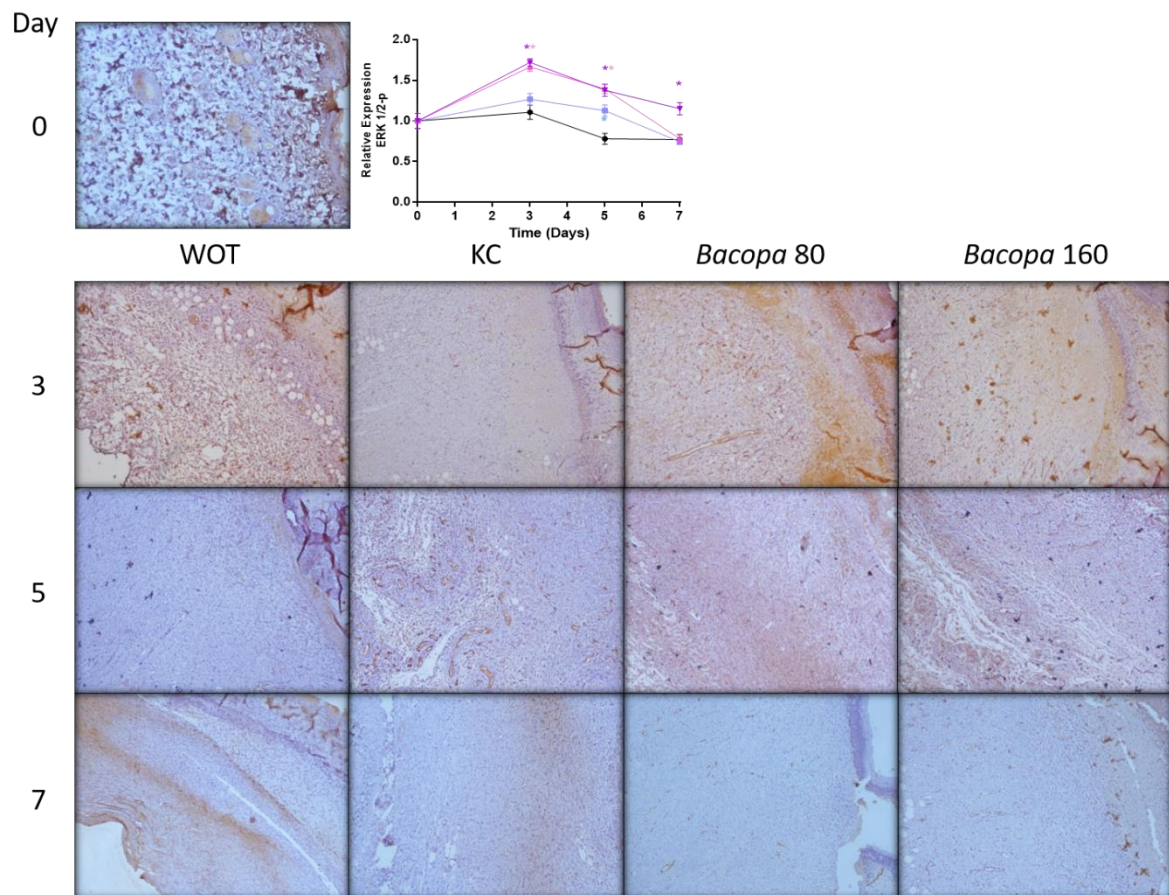

**Figure S5. ERK 1/2-p expression.** Representative microphotographs of ERK 1/2 phosphorylated protein by immunohistochemistry detection on wound tissue at different periods of time (0, 3, 5 and 7 days) in WOT (black line), KC (blue line), and 80 mg/mL (pink line) and 160 mg/mL (purple line) of PB. \* $p < 0.05$  vs WOT.
